# Supplementary material for: Two scandium coordination polymers: rapid synthesis and catalytic properties
Source: Royal Society of Chemistry journal article supplement (doi:10.1039/c9ce00969h), 2019-01-01

## Supporting Information

### Two Scandium coordination polymers: rapid synthesis and catalytic property

Ziqian Zhu,<sup>a</sup> Yufang Tao,<sup>a</sup> Yansong Jiang,<sup>a</sup> Liying Zhang,<sup>b</sup> Jianing Xu,<sup>a</sup> Li Wang<sup>\*a</sup> and Yong Fan<sup>\*a</sup>

<sup>a</sup> *College of Chemistry, Jilin University, Changchun 130012, P. R. China*

email: [lwang99@jlu.edu.cn](mailto:lwang99@jlu.edu.cn), [mrfy@jlu.edu.cn](mailto:mrfy@jlu.edu.cn).

<sup>b</sup> *College of Food Engineering, Jilin Engineering Normal University, Changchun 130052, P. R. China*

## Table of Contents

---

|                                                                                       |        |
|---------------------------------------------------------------------------------------|--------|
| <b>Fig. S1</b> The PXRD patterns for <b>1<sup>h</sup></b> and <b>1<sup>m</sup></b> .  | S3     |
| <b>Fig. S2</b> The PXRD patterns for <b>2<sup>h</sup></b> and <b>2<sup>m</sup></b> .  | S3     |
| <b>Fig. S3</b> The IR spectrum of <b>1</b> .                                          | S4     |
| <b>Fig. S4</b> The IR spectrum of <b>2</b> .                                          | S4     |
| <b>Fig. S5</b> The TGA curve of <b>1</b> measured in air atmosphere.                  | S5     |
| <b>Fig. S6</b> The TGA curve of <b>2</b> measured in air atmosphere.                  | S5     |
| <b>Fig. S7</b> The study on the recycling of <b>2<sup>m</sup></b> .                   | S6     |
| <b>Fig. S8</b> The <sup>1</sup> H NMR data for the cyanosilylation reaction products  | S10-16 |
| <b>Table S1</b> The crystal data and structure refinement for <b>1</b> and <b>2</b> . | S7     |
| <b>Table S2</b> The selected bond length and angle data for <b>1</b> and <b>2</b> .   | S8-S9  |

---

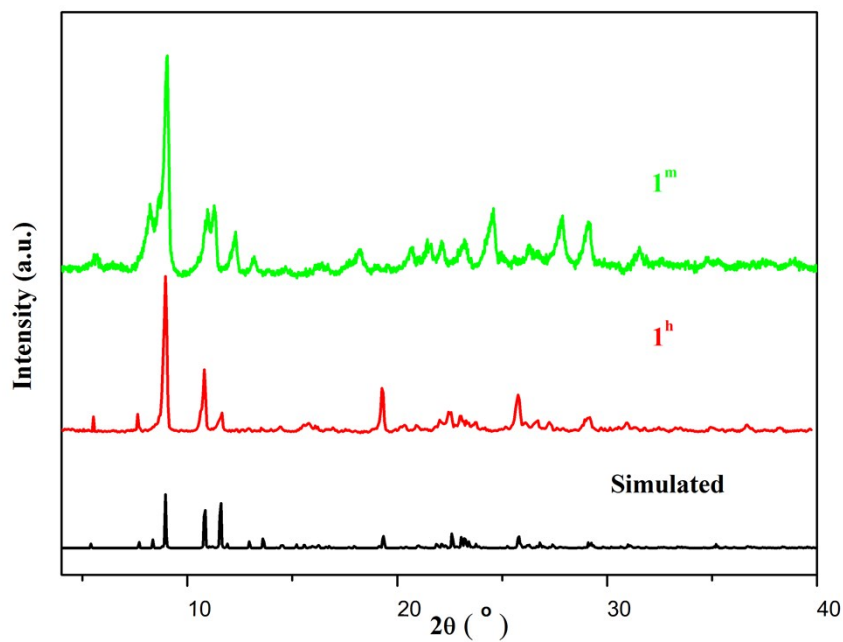

Fig. S1 PXRd patterns for  $1^h$  and  $1^m$ .

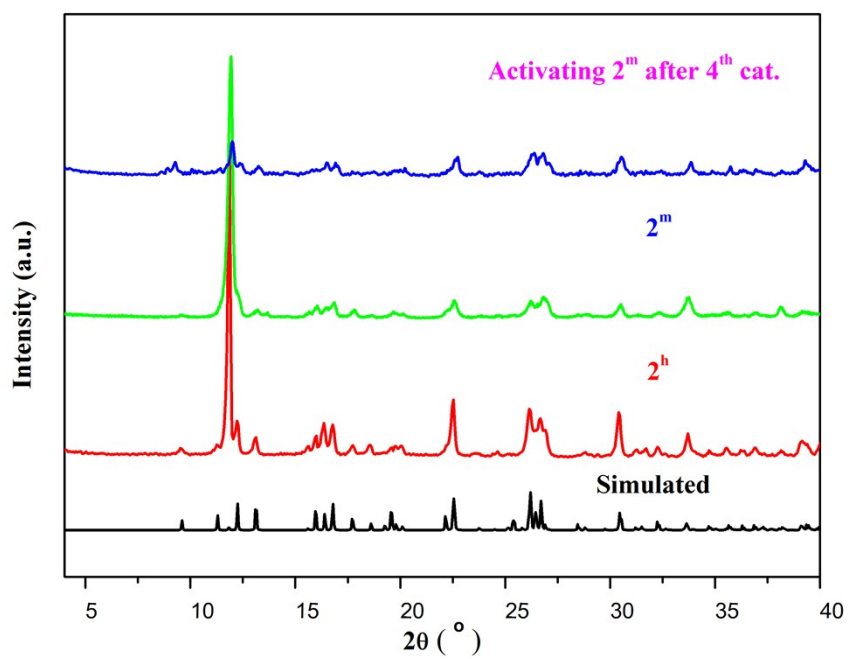

Fig. S2 PXRd patterns for  $2^h$  and  $2^m$ .

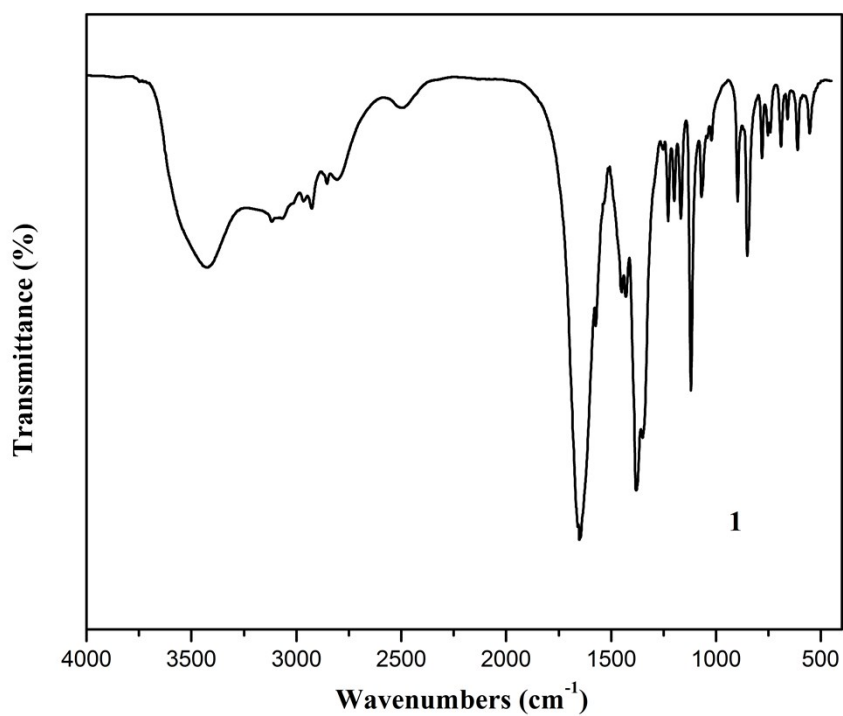

**Fig. S3** The IR spectrum of **1**.

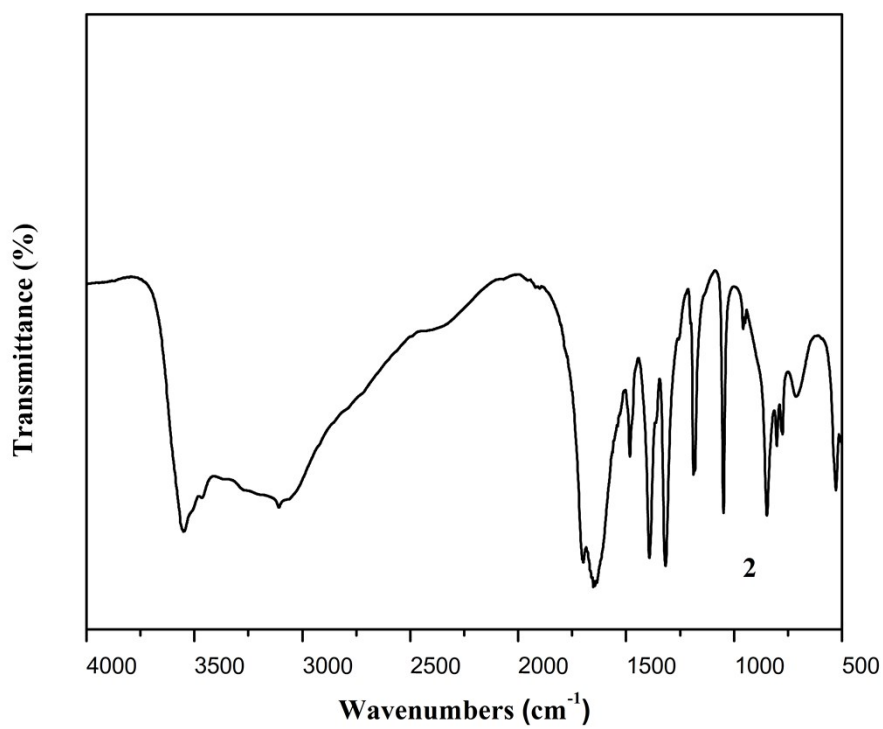

**Fig. S4** The IR spectrum of **2**.

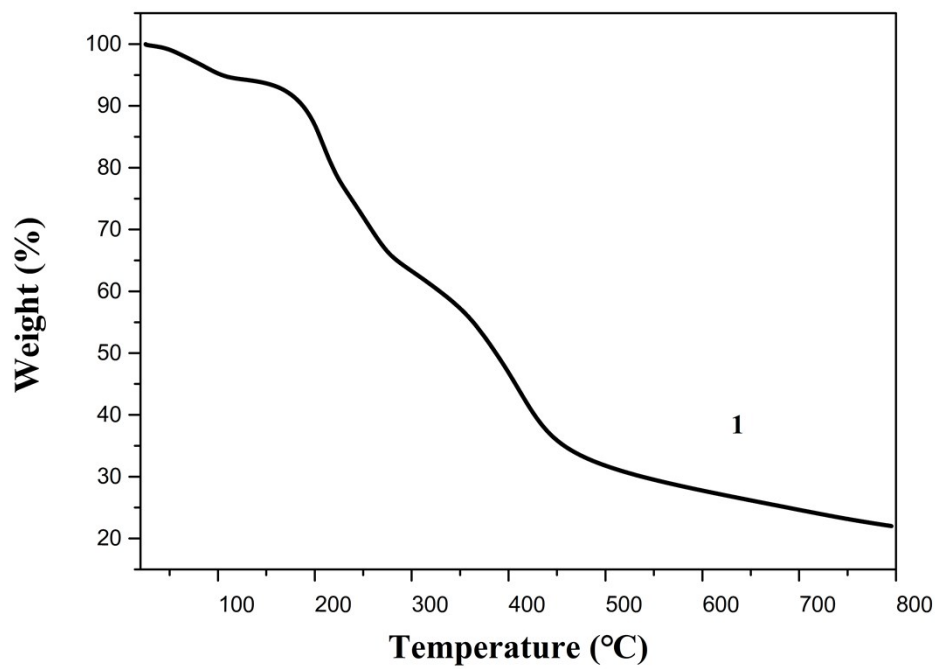

**Fig. S5** The TGA curve for **1**.

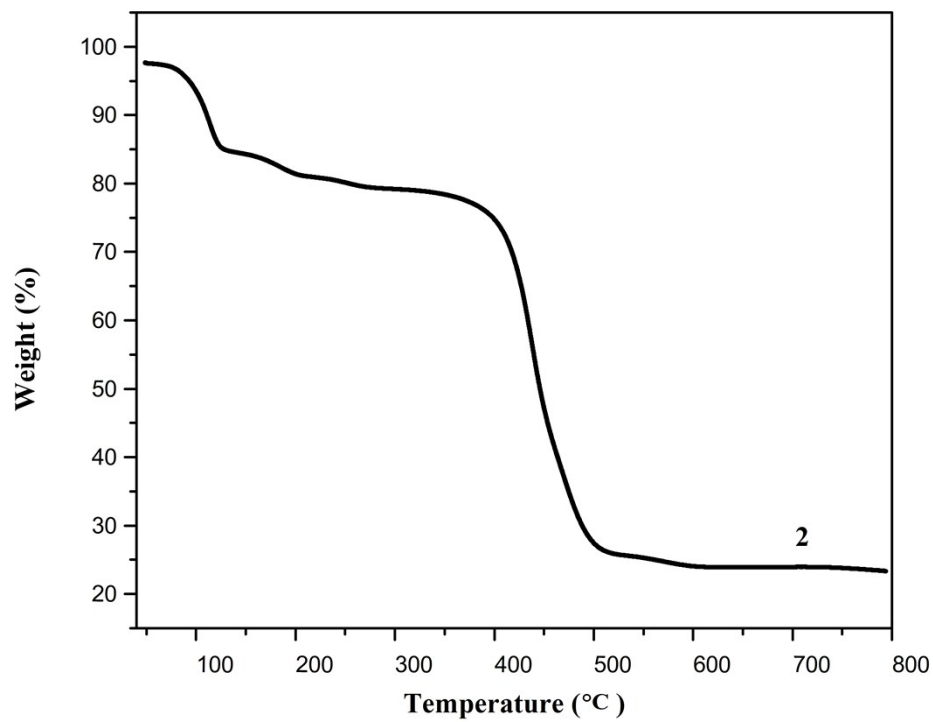

**Fig. S6** The TGA curve for **2**.

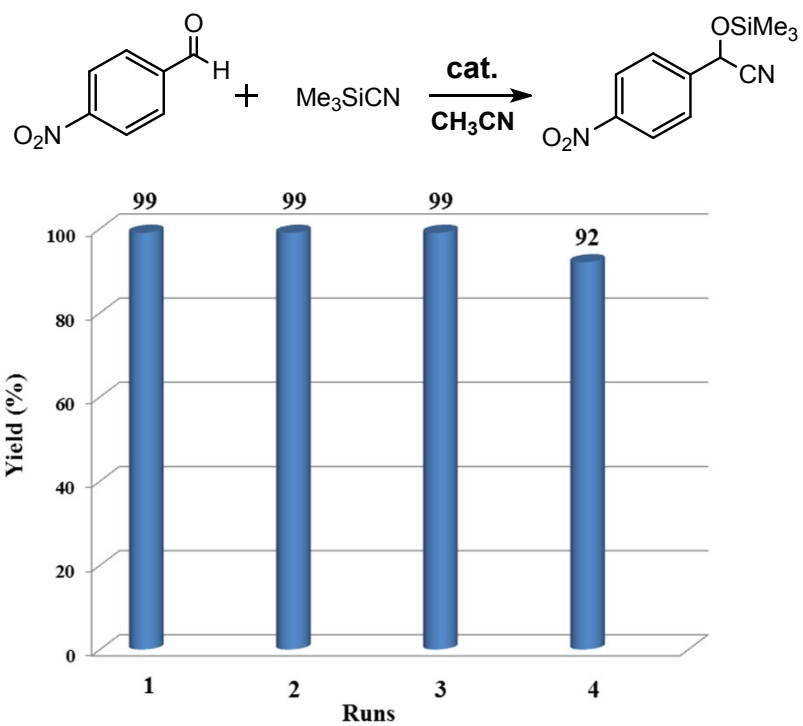

**Fig. S7** The study on the recycling of  $2^m$  for the heterogeneous cyanosilylation.

**Table S1** The crystal data and structure refinement for **1** and **2**.

| Complex                                                                     | 1                                                                 | 2                                                              |
|-----------------------------------------------------------------------------|-------------------------------------------------------------------|----------------------------------------------------------------|
| Formula                                                                     | C <sub>15</sub> H <sub>10</sub> N <sub>5</sub> O <sub>9</sub> Sc  | C <sub>7</sub> H <sub>8</sub> N <sub>2</sub> O <sub>9</sub> Sc |
| Fw (g·mol <sup>-1</sup> )                                                   | 449.24                                                            | 309.1                                                          |
| Temperature (K)                                                             | 293(2)                                                            | 293(2)                                                         |
| Wave length (Å)                                                             | 0.71073                                                           | 0.71073                                                        |
| Crystal system                                                              | triclinic                                                         | triclinic                                                      |
| Space group                                                                 | P-1                                                               | P-1                                                            |
| <i>a</i> (Å)                                                                | 12.1982(9)                                                        | 8.0179(5)                                                      |
| <i>b</i> (Å)                                                                | 12.6561(10)                                                       | 8.1281(6)                                                      |
| <i>c</i> (Å)                                                                | 17.4615(13)                                                       | 10.1235(8)                                                     |
| $\alpha$ (°)                                                                | 79.068(5)                                                         | 67.896(4)                                                      |
| $\beta$ (°)                                                                 | 69.577(4)                                                         | 77.329(5)                                                      |
| $\gamma$ (°)                                                                | 65.464(4)                                                         | 87.356(4)                                                      |
| Volume (Å <sup>3</sup> )                                                    | 2295.0(3)                                                         | 595.89(7)                                                      |
| <i>Z</i>                                                                    | 4                                                                 | 2                                                              |
| <i>D</i> <sub>calc</sub> (g·cm <sup>-3</sup> )                              | 1.300                                                             | 1.617                                                          |
| <i>F</i> (000)                                                              | 912                                                               | 292                                                            |
| $\theta$ range (°)                                                          | 1.771 to 25.075                                                   | 2.225 to 25.018                                                |
| Index range (°)                                                             | -14<= <i>h</i> <=14<br>-15<= <i>k</i> <=13<br>-19<= <i>l</i> <=20 | -9<= <i>h</i> <=9<br>-8<= <i>k</i> <=9<br>-10<= <i>l</i> <=12  |
| Refl. Collected/ unique                                                     | 13126 / 8125                                                      | 3361/2087                                                      |
| <i>R</i> <sub>int</sub>                                                     | 0.0537                                                            | 0.0332                                                         |
| Completeness                                                                | 97.9 %                                                            | 96.6 %                                                         |
| Goodness-of-fit on <i>F</i> <sup>2</sup>                                    | 0.784                                                             | 1.085                                                          |
| <i>R</i> <sub>1</sub> , <i>wR</i> <sub>2</sub> [ <i>I</i> > 2σ( <i>I</i> )] | 0.0506, 0.1099                                                    | 0.0317, 0.0932                                                 |
| <i>R</i> <sub>1</sub> , <i>wR</i> <sub>2</sub> (all data)                   | 0.1154, 0.1229                                                    | 0.0352, 0.0957                                                 |
| Largest diff. peak and hole (eÅ <sup>-3</sup> )                             | 0.456, -0.269                                                     | 0.777, -0.275                                                  |
| CCDC Number                                                                 | 1054439                                                           | 1054440                                                        |

$$R_1 = \frac{\sum ||F_o| - |F_c||}{\sum |F_o|}, wR_2 = \left[ \frac{\sum [w (F_o^2 - F_c^2)^2]}{\sum [w (F_o^2)]} \right]^{1/2}$$

**Table S2.** The selected bond length [Å] and angle [°] data for **1** and **2**.

| <b>1</b>              |            |                      |            |
|-----------------------|------------|----------------------|------------|
| N(1)-Sc(1)            | 2.422(3)   | O(1)-Sc(2)           | 2.085(3)   |
| N(3)-Sc(1)            | 2.497(4)   | O(7)-Sc(2)#3         | 2.133(3)   |
| N(5)-Sc(2)            | 2.464(3)   | O(9)-Sc(2)           | 2.113(3)   |
| N(7)-Sc(2)#3          | 2.438(3)   | O(11)-Sc(2)          | 2.142(3)   |
| O(2)-Sc(1)            | 2.124(3)   | O(15)-Sc(2)          | 2.035(3)   |
| O(6)-Sc(1)            | 2.117(3)   | Sc(1)-O(18)#4        | 2.064(3)   |
| O(12)-Sc(1)           | 2.163(3)   | O(13)-Sc(1)          | 2.033(3)   |
| O(13)#2-Sc(1)-O(18)#4 | 177.16(13) | O(15)#1-Sc(2)-O(1)   | 179.56(13) |
| O(13)#2-Sc(1)-O(6)    | 90.39(13)  | O(15)#1-Sc(2)-O(9)   | 92.22(12)  |
| O(18)#4-Sc(1)-O(6)    | 92.01(12)  | O(1)-Sc(2)-O(9)      | 87.44(12)  |
| O(13)#2-Sc(1)-O(2)    | 85.60(12)  | O(15)#1-Sc(2)-O(7)#3 | 91.89(12)  |
| O(18)#4-Sc(1)-O(2)    | 93.52(12)  | O(1)-Sc(2)-O(7)#3    | 88.55(12)  |
| O(6)-Sc(1)-O(2)       | 140.28(11) | O(9)-Sc(2)-O(7)#3    | 141.93(11) |
| O(13)#2-Sc(1)-O(12)   | 93.39(12)  | O(15)#1-Sc(2)-O(11)  | 91.89(12)  |
| O(18)#4-Sc(1)-O(12)   | 83.78(11)  | O(1)-Sc(2)-O(11)     | 88.21(12)  |
| O(6)-Sc(1)-O(12)      | 140.70(12) | O(9)-Sc(2)-O(11)     | 141.40(12) |
| O(2)-Sc(1)-O(12)      | 79.02(11)  | O(7)#3-Sc(2)-O(11)   | 76.20(11)  |
| O(13)#2-Sc(1)-N(1)    | 94.23(12)  | O(15)#1-Sc(2)-N(7)#3 | 87.56(12)  |
| O(18)#4-Sc(1)-N(1)    | 87.96(12)  | O(1)-Sc(2)-N(7)#3    | 92.61(12)  |
| O(6)-Sc(1)-N(1)       | 72.01(11)  | O(9)-Sc(2)-N(7)#3    | 73.26(11)  |
| O(2)-Sc(1)-N(1)       | 68.92(11)  | O(7)#3-Sc(2)-N(7)#3  | 69.13(11)  |
| O(12)-Sc(1)-N(1)      | 146.30(12) | O(11)-Sc(2)-N(7)#3   | 145.28(12) |
| O(13)#2-Sc(1)-N(3)    | 86.20(12)  | O(15)#1-Sc(2)-N(5)   | 88.70(12)  |
| O(18)#4-Sc(1)-N(3)    | 93.33(12)  | O(1)-Sc(2)-N(5)      | 90.92(11)  |
| O(6)-Sc(1)-N(3)       | 67.23(12)  | O(9)-Sc(2)-N(5)      | 68.90(11)  |
| O(2)-Sc(1)-N(3)       | 151.24(12) | O(7)#3-Sc(2)-N(5)    | 149.04(12) |
| O(12)-Sc(1)-N(3)      | 74.01(12)  | O(11)-Sc(2)-N(5)     | 72.85(12)  |
| N(1)-Sc(1)-N(3)       | 139.24(12) | N(7)#3-Sc(2)-N(5)    | 141.78(12) |

Symmetry transformations used to generate equivalent atoms:

#1 -x+1,-y+1,-z+1; #2 -x+1,-y+1,-z; #3 -x,-y+2,-z+1; #4 -x+2,-y,-z



---

**2**

---

|                 |            |                 |            |
|-----------------|------------|-----------------|------------|
| Sc(1)-O(1)      | 2.1529(17) | Sc(1)-O(5)      | 2.1402(16) |
| Sc(1)-O(2)      | 2.2164(18) | Sc(1)-O(6)      | 2.2767(16) |
| Sc(1)-O(3)      | 2.1601(18) | Sc(1)-N(1)      | 2.4463(19) |
| Sc(1)-O(4)      | 2.2068(18) | Sc(1)-N(2)      | 2.480(2)   |
| O(1)-Sc(1)-O(2) | 88.11(7)   | O(5)-Sc(1)-O(6) | 133.95(6)  |
| O(1)-Sc(1)-O(3) | 86.81(7)   | O(1)-Sc(1)-N(1) | 68.87(6)   |
| O(1)-Sc(1)-O(4) | 95.37(7)   | O(2)-Sc(1)-N(1) | 75.85(6)   |
| O(1)-Sc(1)-O(6) | 74.04(6)   | O(3)-Sc(1)-N(1) | 141.74(7)  |
| O(2)-Sc(1)-O(6) | 143.92(6)  | O(4)-Sc(1)-N(1) | 70.53(6)   |
| O(3)-Sc(1)-O(2) | 74.21(7)   | O(5)-Sc(1)-N(1) | 76.81(6)   |
| O(3)-Sc(1)-O(4) | 143.48(7)  | O(6)-Sc(1)-N(1) | 123.23(6)  |
| O(3)-Sc(1)-O(6) | 73.72(6)   | O(1)-Sc(1)-N(2) | 145.16(7)  |
| O(4)-Sc(1)-O(2) | 142.19(7)  | O(2)-Sc(1)-N(2) | 117.00(7)  |
| O(4)-Sc(1)-O(6) | 71.94(6)   | O(3)-Sc(1)-N(2) | 78.26(7)   |
| O(5)-Sc(1)-O(1) | 144.99(6)  | O(4)-Sc(1)-N(2) | 79.51(7)   |
| O(5)-Sc(1)-O(2) | 76.79(6)   | O(5)-Sc(1)-N(2) | 68.40(6)   |
| O(5)-Sc(1)-O(3) | 118.04(7)  | O(6)-Sc(1)-N(2) | 71.61(6)   |
| O(5)-Sc(1)-O(4) | 79.15(6)   |                 |            |

---

Symmetry transformations used to generate equivalent atoms:

#1 -x+1,-y,-z; #2 -x+1,-y,-z+1; #3 -x+2,-y,-z+1

**Fig. S8** The  $^1\text{H}$  NMR data for the cyanosilylation reaction products.

$^1\text{H}$  NMR (400 MHz,  $\text{CD}_3\text{CN}$ )  $\delta$  = 8.30 (d,  $J$  = 7.6 Hz, 2H), 7.77 (d,  $J$  = 7.6 Hz, 2H), 5.89 (s, 1H), 0.27 (s, 9H).

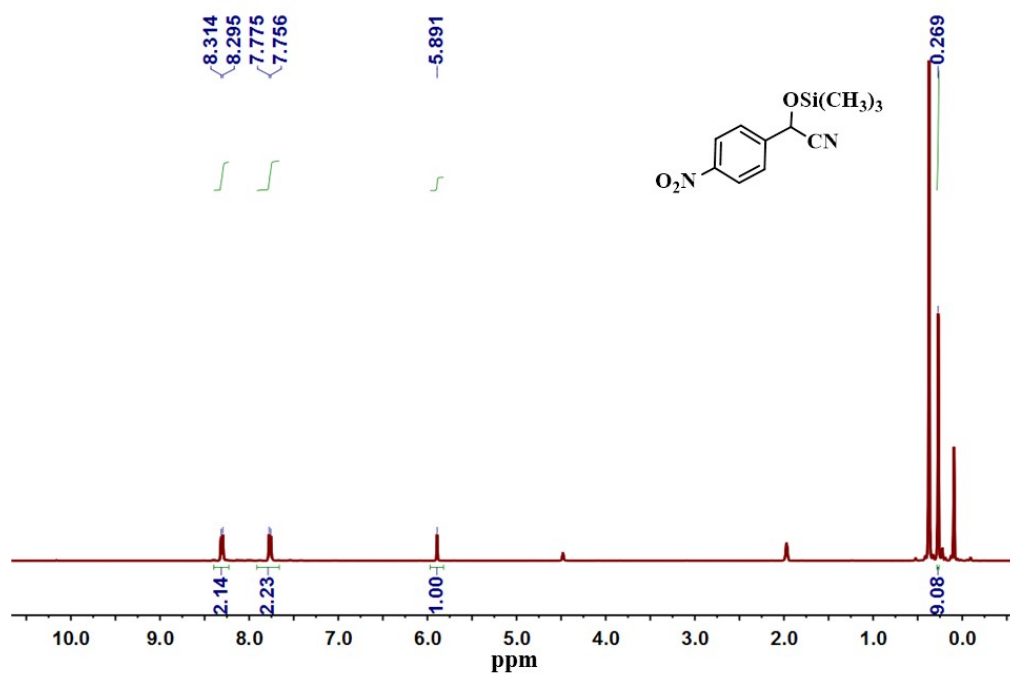

$^1\text{H}$  NMR (400 MHz,  $\text{CD}_3\text{CN}$ )  $\delta$  = 7.84 (d,  $J$  = 7.2 Hz, 2H), 7.69 (d,  $J$  = 7.6 Hz, 2H), 5.83 (s, 1H), 0.25 (s, 9H).

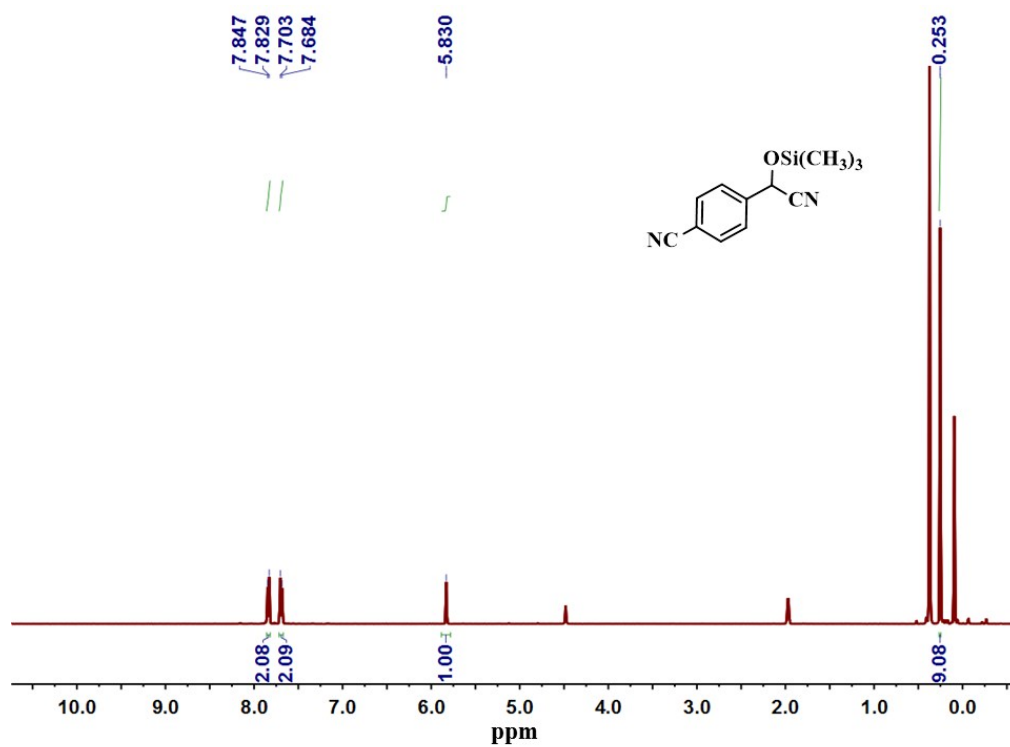

$^1\text{H}$  NMR (400 MHz,  $\text{CD}_3\text{CN}$ )  $\delta$  = 7.80 (d,  $J$  = 8.0 Hz, 2H), 7.72 (d,  $J$  = 8.0 Hz, 2H), 5.84 (s, 1H), 0.25 (s, 9H).

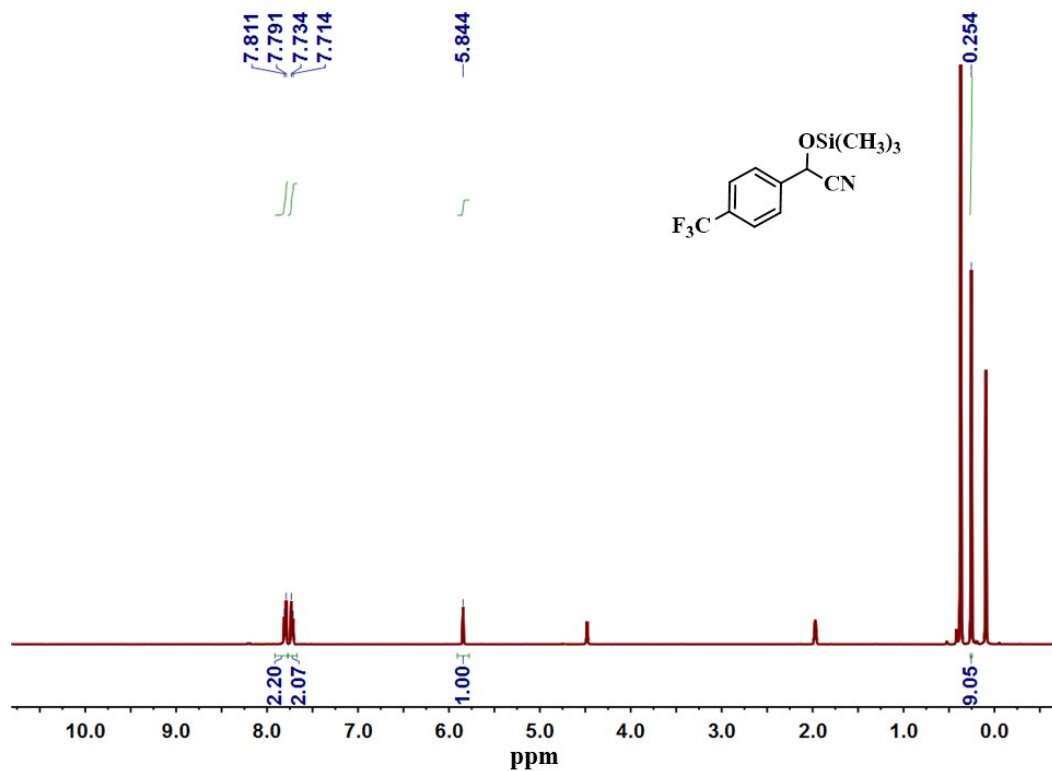

$^1\text{H}$  NMR (400 MHz,  $\text{CD}_3\text{CN}$ )  $\delta$  = 7.56 (m, 2H), 7.22 (t,  $J$  = 8.2 Hz, 2H), 5.73 (s, 1H), 0.23 (s, 9H).

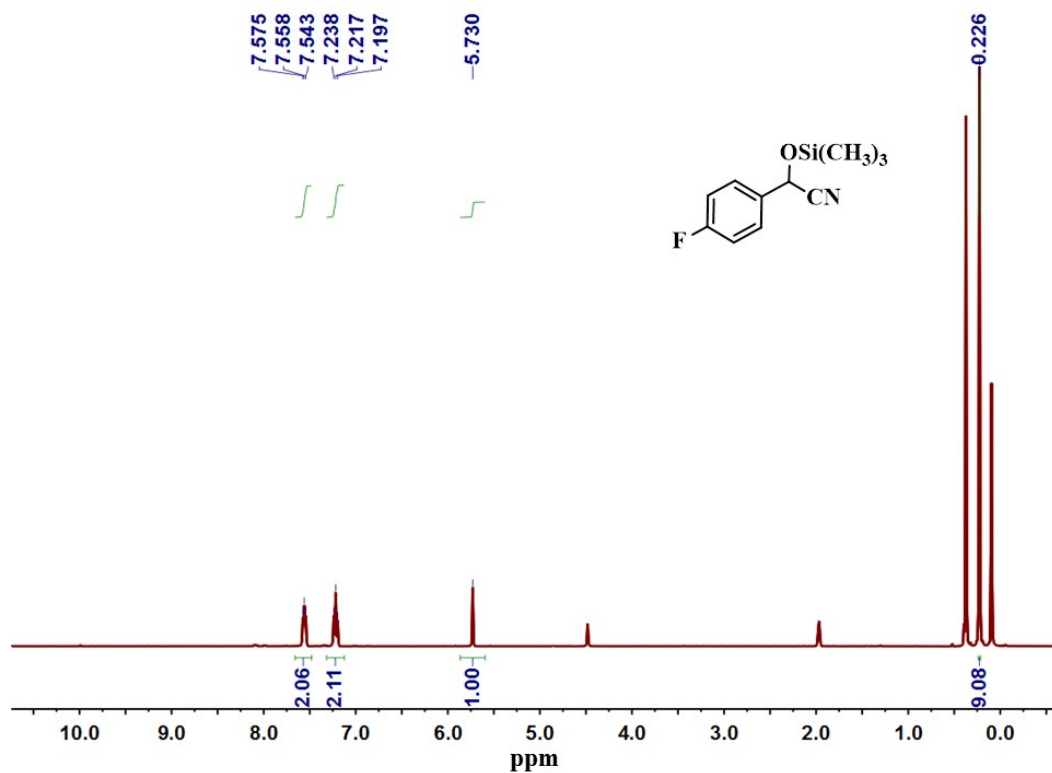

$^1\text{H}$  NMR (400 MHz,  $\text{CD}_3\text{CN}$ )  $\delta$  = 8.30 (d,  $J$  = 7.6 Hz, 2H), 7.77 (d,  $J$  = 7.6 Hz, 2H), 5.89 (s, 1H), 0.27 (s, 9H).

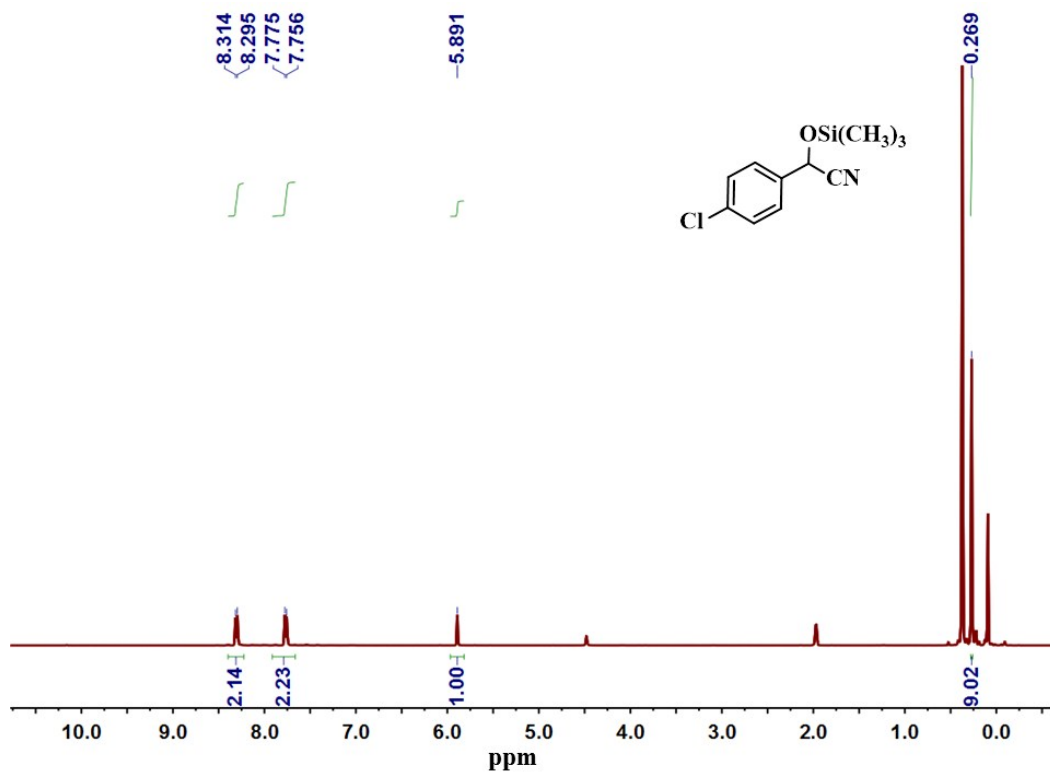

$^1\text{H}$  NMR (400 MHz,  $\text{CD}_3\text{CN}$ )  $\delta$  = 7.65 (d,  $J$  = 7.6 Hz, 2H), 7.45 (d,  $J$  = 7.6 Hz, 2H), 5.72 (s, 1H), 0.23 (s, 9H).

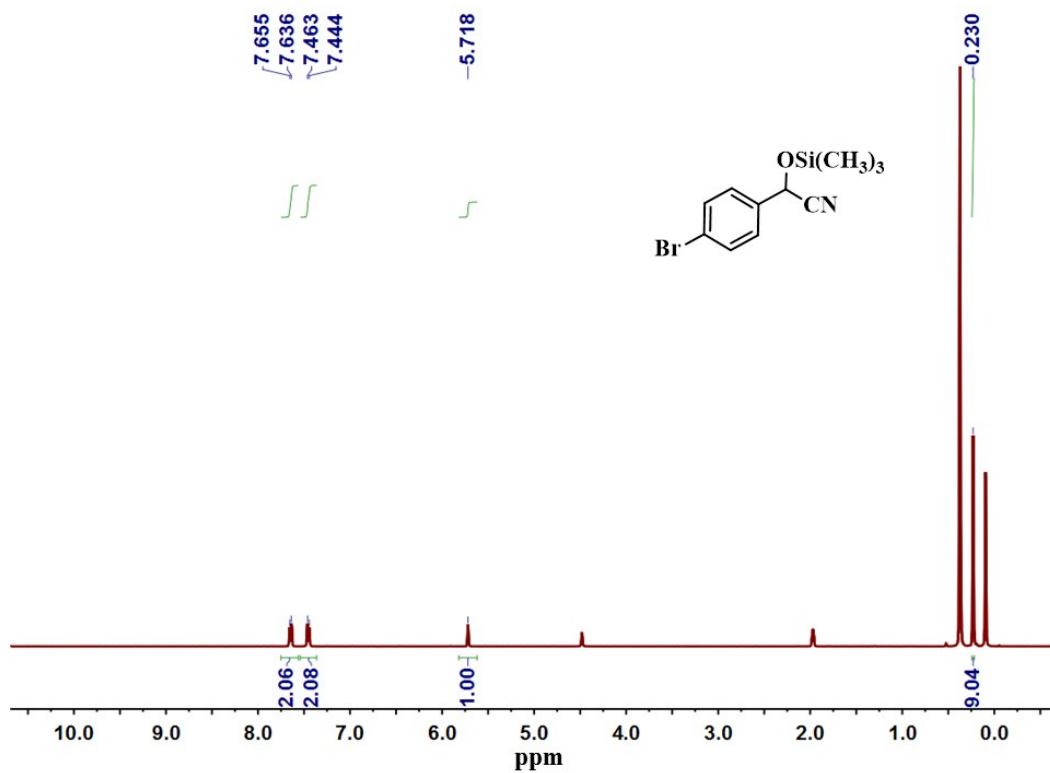

$^1\text{H}$  NMR (400 MHz,  $\text{CD}_3\text{CN}$ )  $\delta$  = 7.44 (d,  $J$  = 8.0 Hz, 2H), 7.01 (d,  $J$  = 7.6 Hz, 2H), 5.66 (s, 1H), 3.83 (s, 3H), 0.21 (s, 9H).

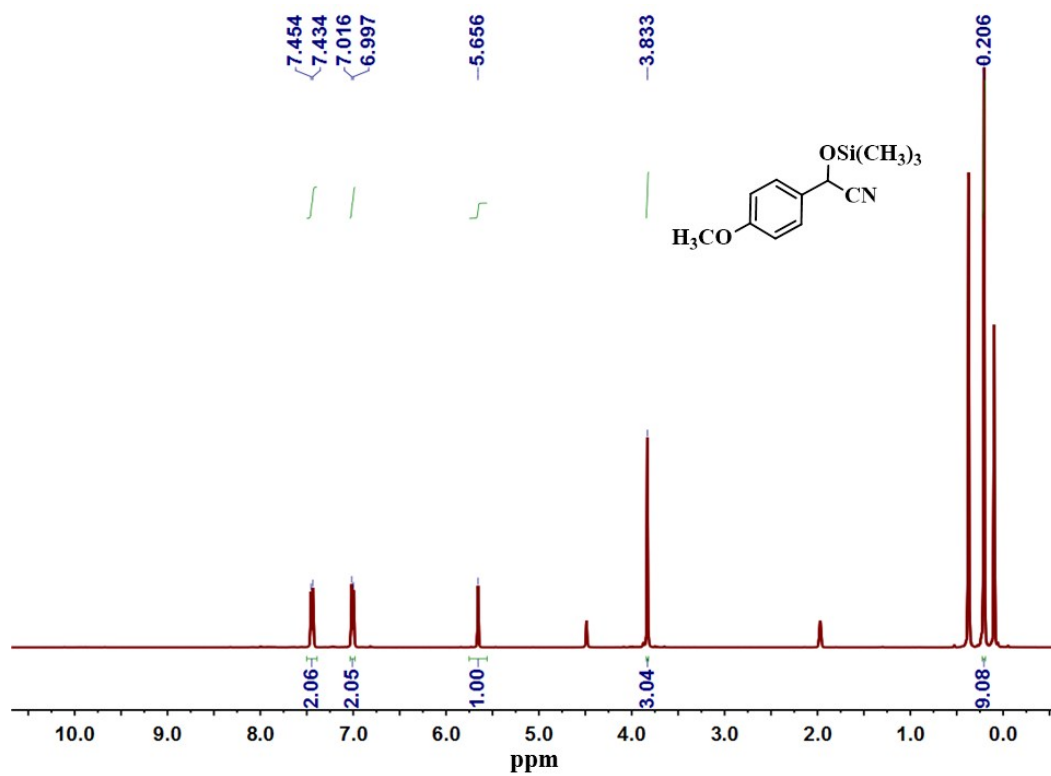

$^1\text{H}$  NMR (400 MHz,  $\text{CD}_3\text{CN}$ )  $\delta$  = 7.41 (d,  $J$  = 7.2 Hz, 2H), 7.29 (d,  $J$  = 7.2 Hz, 2H), 5.68 (s, 1H), 2.39 (s, 3H), 0.21 (s, 9H).

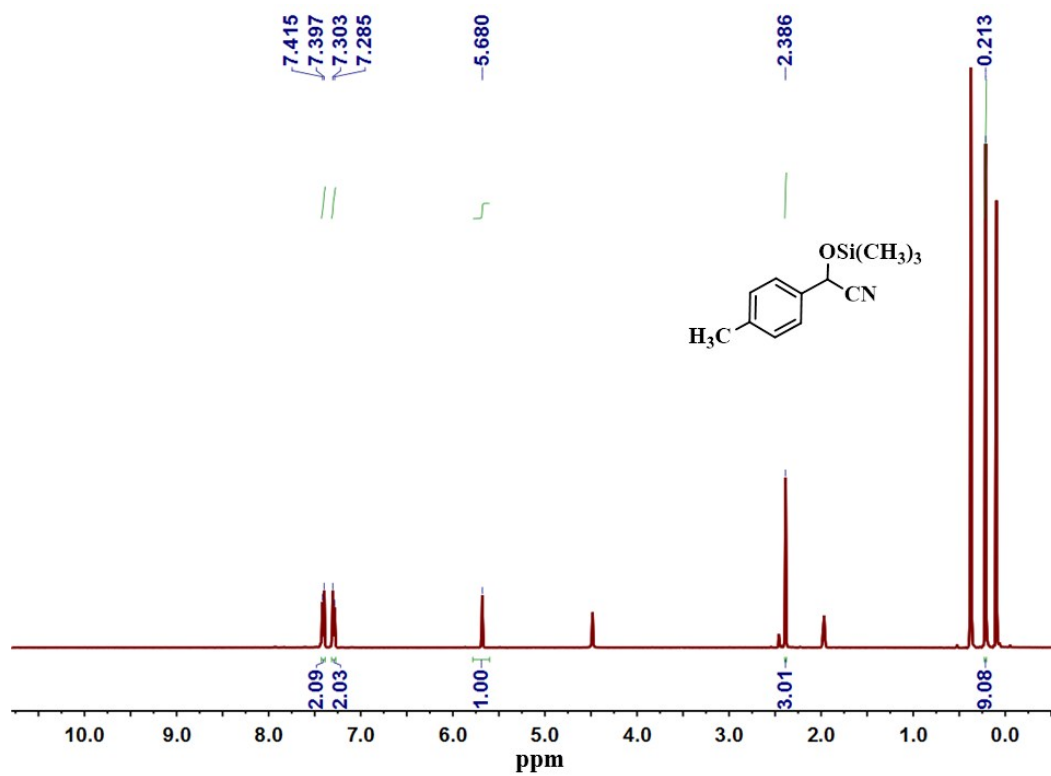

$^1\text{H}$  NMR (400 MHz,  $\text{CDCl}_3$ )  $\delta$  = 4.41 (t,  $J$  = 6.6 Hz, 1H), 1.81 (dd,  $J$  = 15.2, 6.8 Hz, 2H), 1.43 (m, 4H), 0.95 (t,  $J$  = 7.2 Hz, 3H), 0.23 (s, 9H).

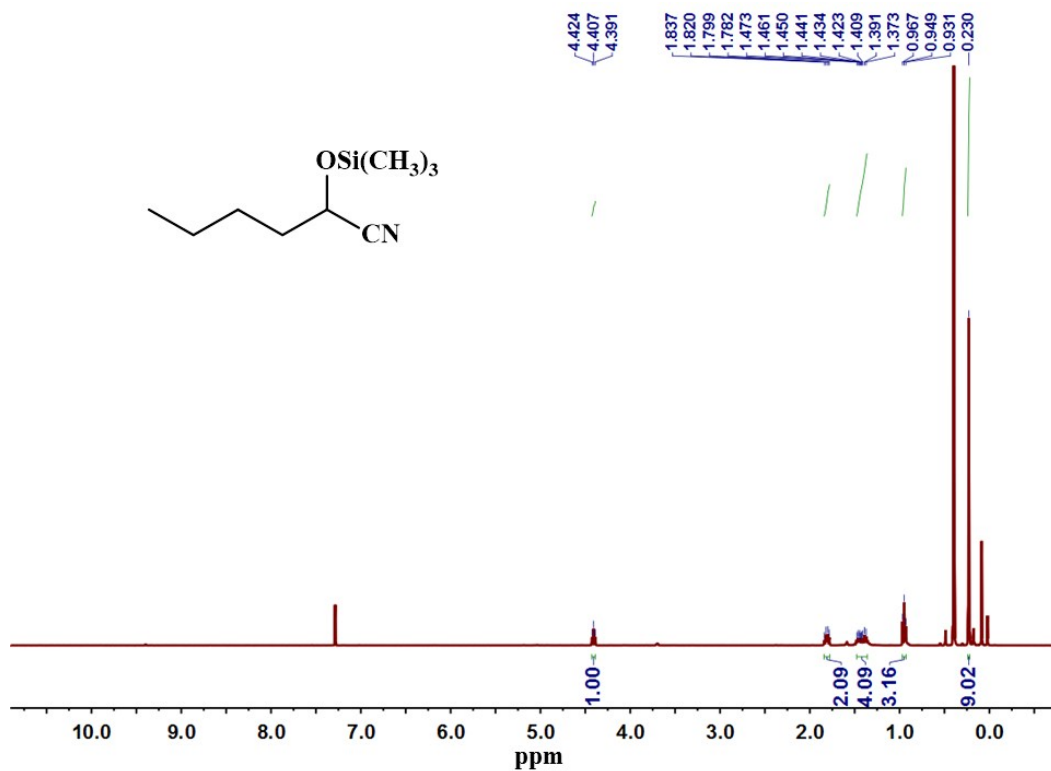

$^1\text{H}$  NMR (400 MHz,  $\text{CDCl}_3$ )  $\delta$  = 7.41 (m, 5H), 6.84 (d,  $J$  = 15.6 Hz, 1H), 6.22 (dd,  $J$  = 16.0, 6.0 Hz, 1H), 5.15 (dd,  $J$  = 6.0, 1.2 Hz, 1H), 0.28 (s, 9H).

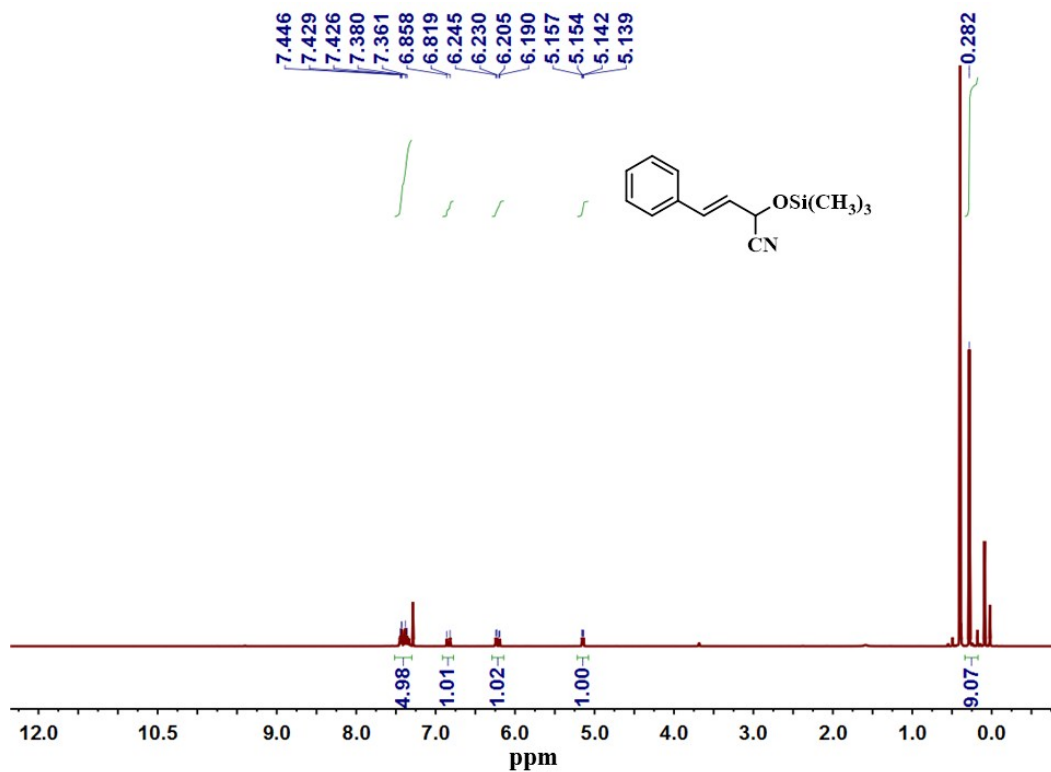

$^1\text{H NMR}$  (400 MHz,  $\text{CDCl}_3$ )  $\delta$  = 8.71 (s, 2H), 7.43 (s, 2H), 5.53 (s, 1H), 0.31 (s, 9H).

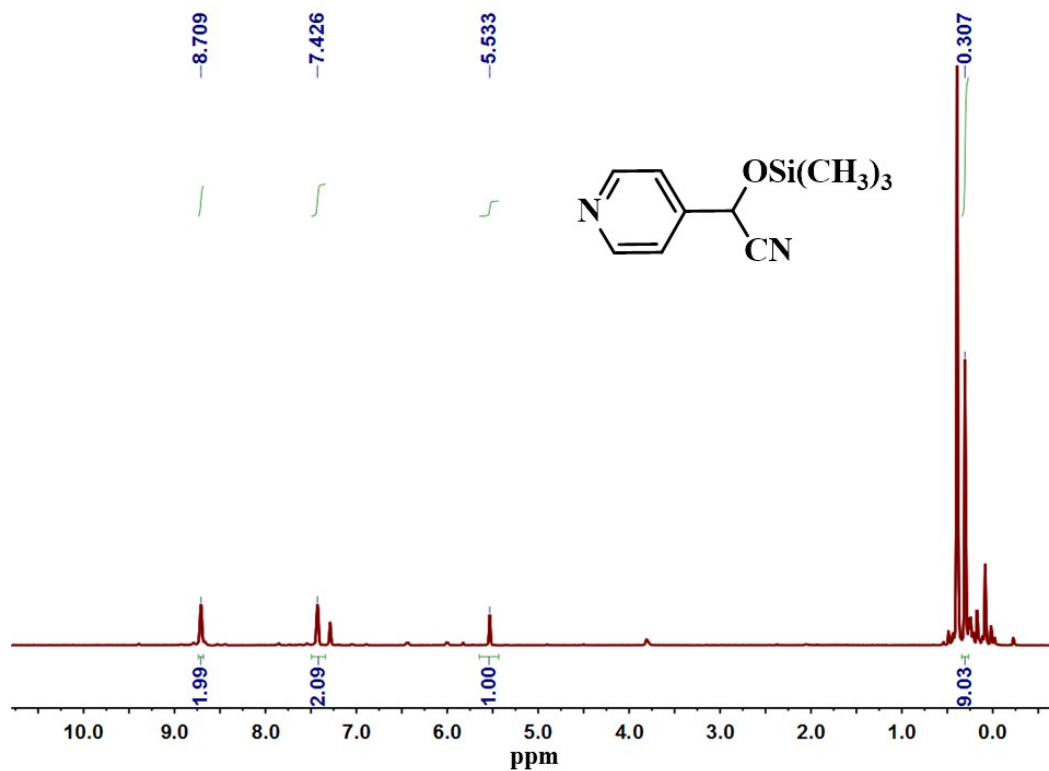

$^1\text{H NMR}$  (400 MHz,  $\text{CDCl}_3$ )  $\delta$  = 7.41 (m, 4H), 7.17 (t,  $J$  = 7.4 Hz, 1H), 7.04 (m, 4H), 5.49 (s, 1H), 0.26 (s, 9H).

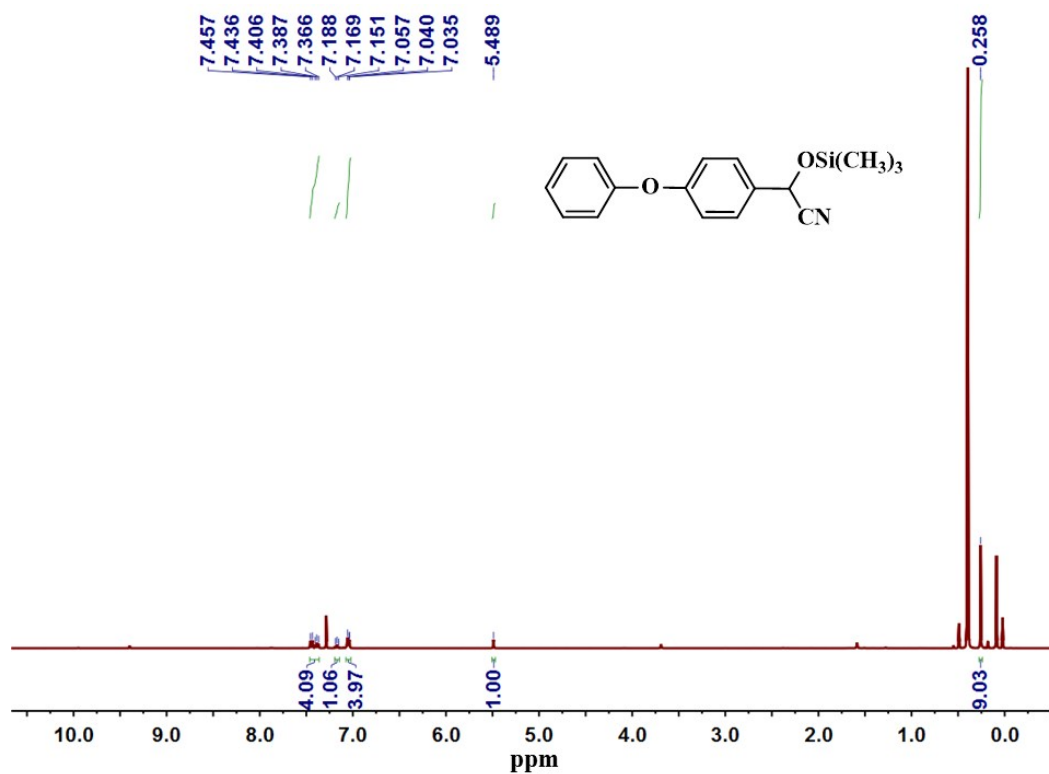

$^1\text{H NMR}$  (400 MHz,  $\text{CDCl}_3$ )  $\delta$  = 7.39 (dd,  $J$  = 5.2, 1.2 Hz, 1H), 7.21 (d,  $J$  = 3.2 Hz, 1H), 7.03 (dd,  $J$  = 4.8, 3.6 Hz, 1H), 5.75 (s, 1H), 0.26 (s, 9H).

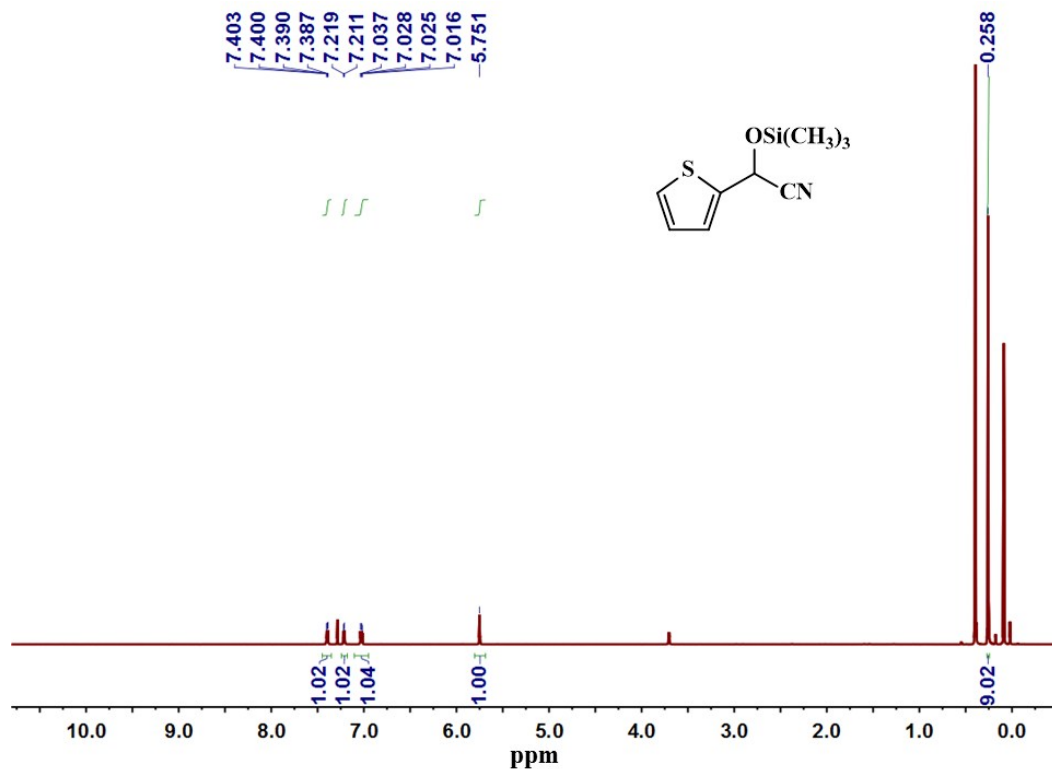

$^1\text{H NMR}$  (400 MHz,  $\text{CDCl}_3$ )  $\delta$  = 8.20 (d,  $J$  = 8.4 Hz, 1H), 7.94 (d,  $J$  = 8.0 Hz, 2H), 7.73 (d,  $J$  = 7.2 Hz, 1H), 7.64 (m, 1H), 7.59 (m, 1H), 7.51 (m, 1H), 6.08 (s, 1H), 0.23 (s, 9H).

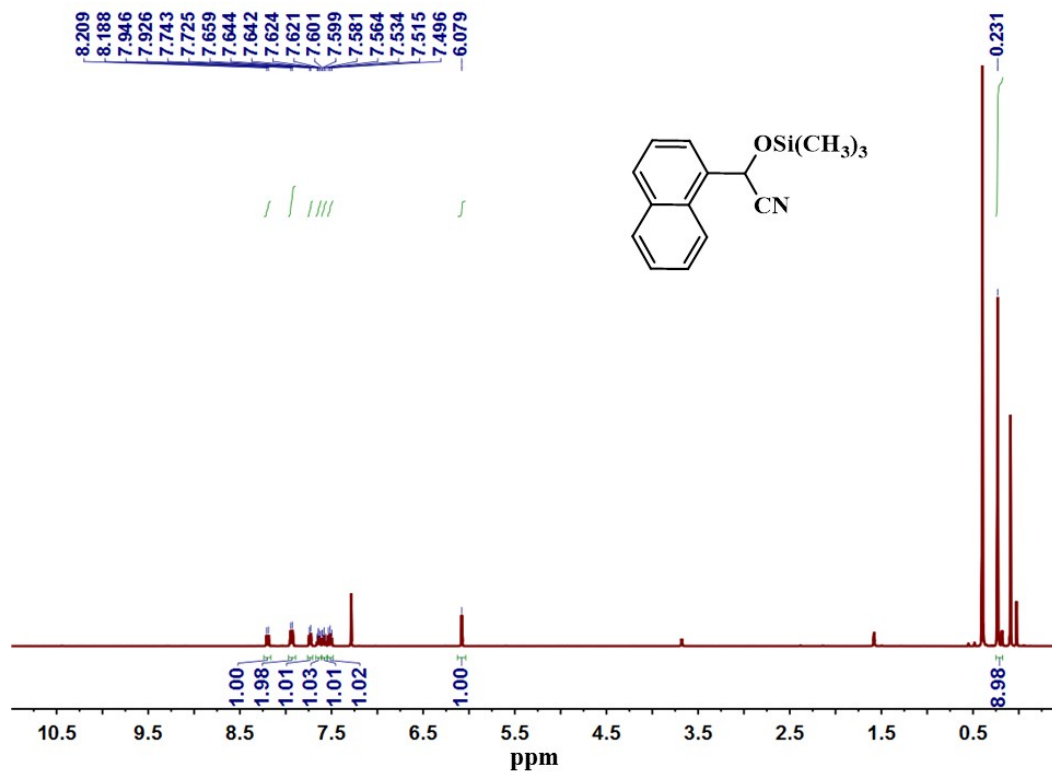

Supplement: c9ce00969h1.pdf [file c9ce00969h1.pdf]
